# Supplementary material
Source: PubMed Central journal article supplement (PMC4094294)
Supplement: NIHMS587355-supplement-Supplementary_Data.pdf [file NIHMS587355-supplement-Supplementary_Data.pdf]

## SUPPLEMENTARY MATERIALS

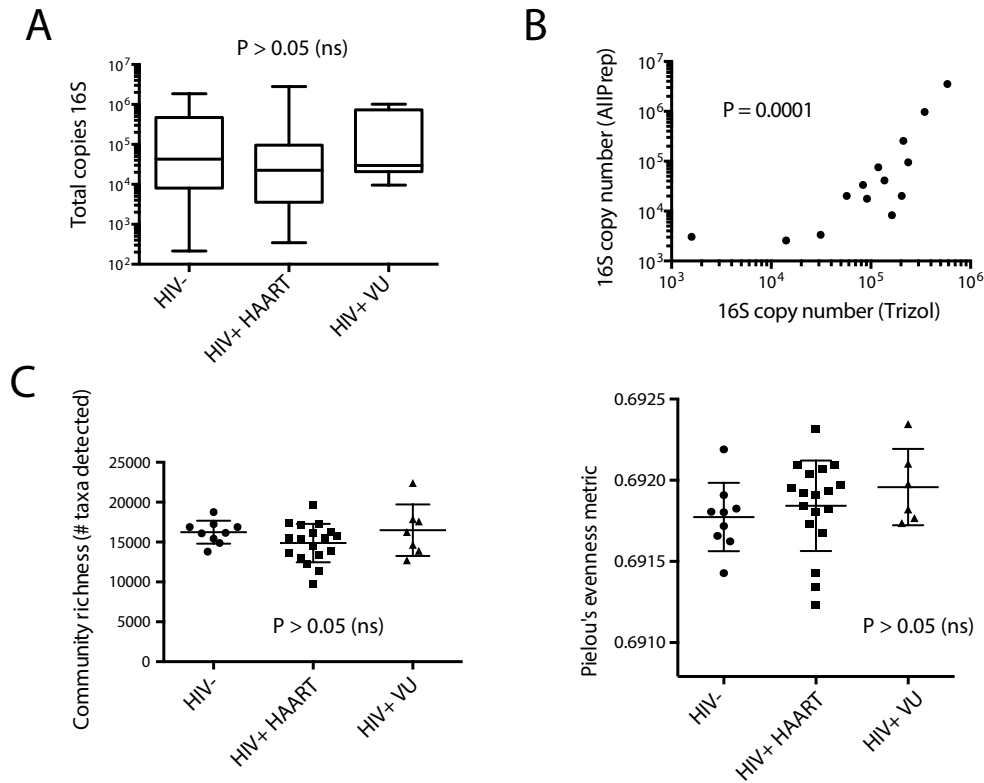

**Figure S1:** Gross bacterial community metrics do not differ significantly across subject groups or intra-subject samples. **(A)** Total bacterial abundances compared between subject groups as measured by TaqMan qPCR assay. The Kruskal-Wallis test was used to test differences in subject groups ( $P > 0.05$ ). **(B)** Total bacterial load is concordant across different biopsies from the same individual and irrespective of DNA extraction method. Y-axis represents total bacterial load measures on biopsies with nucleic acids extracted using the AllPrep kit (Qiagen); X-axis represents separate biopsies from the same individual, taken at the same clinical visit and from the same relative anatomical location, with nucleic acids extracted using Trizol (Life Technologies). Correlation was tested by the Spearman method ( $P = 0.0001$ ; Spearman rho correlation coefficient,  $R_s = 0.86$ ). **(C)** Bacterial community evenness (Pielou's metric) and richness is not significantly different among subject groups. The Kruskal-Wallis test was used to detect significant differences across all subject groups ( $P > 0.05$ ).

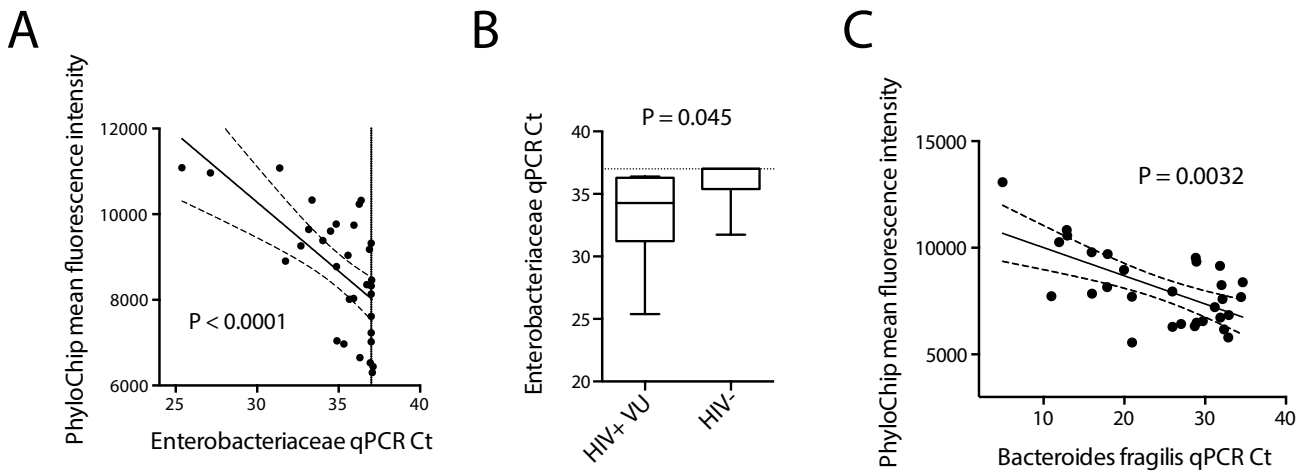

**Figure S2:** Comparisons of quantitative PCR (qPCR) measurements and PhyloChip relative abundance measurements [mean fluorescence intensity (MFI)] for selected taxa of interest. **(A)** PhyloChip MFI of Enterobacteriaceae members within the DMC were averaged and compared by Spearman correlation to qPCR measures of Enterobacteriaceae abundance using sample DNA extracted from mucosal biopsies, as determined by Ct ( $R_s = -0.66$ ,  $p < 0.0001$ ), with linear regression line ( $p < 0.0001$ ). Fine dotted line represents qPCR limit of detection (Ct=37), as determined by Ct for which amplification in no-template controls was observed across replicates. Dotted lines represent 95% CI for linear regression coefficients. **(B)** qPCR measures of Enterobacteriaceae differ in VU subjects compared with HIV-uninfected risk-matched controls ( $P = 0.045$ ). A Mann-Whitney non-parametric test was used to determine significance. Dotted line again represents limit of detection. **(C)** PhyloChip MFI of *Bacteroides fragilis* was compared to qPCR measurements for *B. fragilis* performed on pre-PhyloChip hybridization 16S amplicon samples. Spearman correlation was used to determine significance ( $R_s = -0.52$ ,  $P = 0.0033$ ), with linear regression line ( $P = 0.0002$ ). Dotted lines represent 95% CI for linear regression coefficients.

IMUNOPATHOLOGIC DISEASE MARKERS

|   |                                       |
|---|---------------------------------------|
| A | %IL-17+ in gut CD8 T cells            |
| B | %IL-22+ in gut CD8 T cells            |
| C | %IL-17+ in gut CD4 T cells            |
| D | %IL-22+ in gut CD4 T cells            |
| E | IFAB pg/ml plasma                     |
| F | %Treg in gut (CD25+FoxP3+)            |
| G | Interferon-stimulated gene expression |
| H | sCD14 ng/mL plasma                    |
| I | HIV DNA copies/1e6 cells              |
| J | HIV RNA copies/1e6 cells              |
| K | Gut IDO1 relative mRNA                |
| L | CD4 T cell density in gut             |
| M | CD4 count                             |
| N | Zonulin ng/mL plasma                  |
| O | D-Dimer ng/ml plasma                  |
| P | IL-6 pg/ml plasma                     |
| Q | Stnf-Rll pg/ml plasma                 |
| R | Kyn/Trp                               |
| S | %38+DR+ in blood memory CD4 T cells   |
| T | %38+DR+ in gut CD8 T cells            |
| U | %38+DR+ in gut CD4 T cells            |
| V | %38+DR+ in blood memory CD8 T cells   |
| W | IP-10 pg/ml plasma                    |
| X | Self-reported CD4 nadir               |

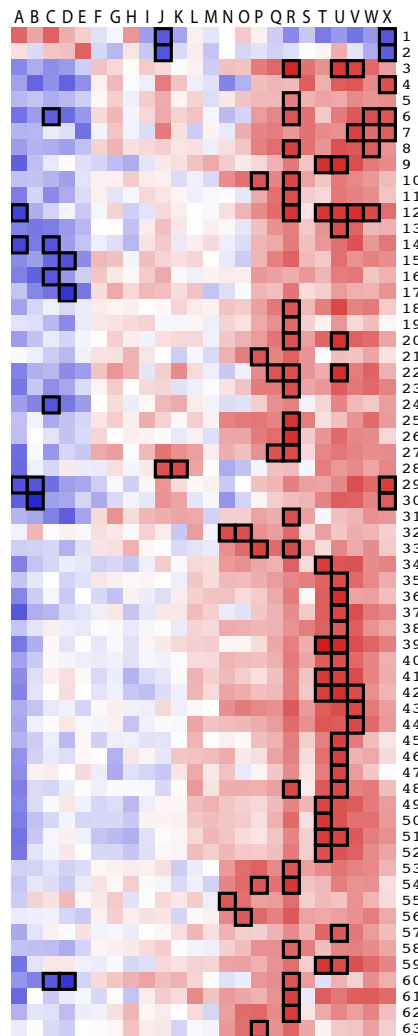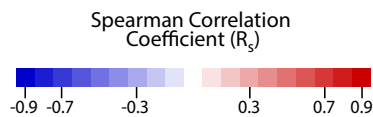

□ indicates unadjusted  $P < 0.005$

BACTERIAL TAXONOMIC CLASSIFICATIONS

|    |                                                                         |
|----|-------------------------------------------------------------------------|
| 1  | c__Bacteroidia, f__Porphyromonadaceae, g__unclassified                  |
| 2  | c__Clostridia, f__Lachnospiraceae, g__Ruminococcus                      |
| 3  | c__Actinobacteria, f__Actinosynnemataceae, g__Actinokineospora          |
| 4  | c__Actinobacteria, f__Bogoriellaceae, g__Georgenia                      |
| 5  | c__Actinobacteria, f__Corynebacteriaceae, g__Corynebacterium            |
| 6  | c__Actinobacteria, f__Microbacteriaceae, g__unclassified                |
| 7  | c__Actinobacteria, f__Micrococcaceae, g__Arthrobacter                   |
| 8  | c__Actinobacteria, f__Mycobacteriaceae, g__Mycobacterium                |
| 9  | c__Alphaproteobacteria, f__Caulobacteraceae, g__unclassified            |
| 10 | c__Alphaproteobacteria, f__Pelagibacteraceae, g__CandidatusPelagibacter |
| 11 | c__Alphaproteobacteria, f__Rhizobiaceae, g__Rhizobium                   |
| 12 | c__Alphaproteobacteria, f__Rhodobacteraceae, g__unclassified            |
| 13 | c__Bacilli, f__Bacillaceae, g__Bacillus                                 |
| 14 | c__Bacilli, f__Bacillaceae, g__Oceanobacillus                           |
| 15 | c__Bacilli, f__Bacillaceae, g__Virgibacillus                            |
| 16 | c__Bacilli, f__Planococcaceae, g__Sporosarcina                          |
| 17 | c__Betaproteobacteria, f__Alcaligenaceae, g__Castellaniella             |
| 18 | c__Betaproteobacteria, f__Neisseriaceae, g__unclassified                |
| 19 | c__Betaproteobacteria, f__Oxalobacteraceae, g__unclassified             |
| 20 | c__Betaproteobacteria, f__Rhodocyclaceae, g__Dechloromonas              |
| 21 | c__Betaproteobacteria, f__unclassified_g_sfA                            |
| 22 | c__Clostridia, f__ClostridialesFamilyXI, IncertaeSedis, g__Anaerococcus |
| 23 | c__Clostridia, f__Lachnospiraceae, g__unclassified                      |
| 24 | c__Clostridia, f__Peptococcaceae, g__Desulfitobacterium                 |
| 25 | c__Deltaproteobacteria, f__Desulfuromonadaceae, g__unclassified         |
| 26 | c__Deltaproteobacteria, f__Nitrospiraceae, g__unclassified              |
| 27 | c__Deltaproteobacteria, f__unclassified_g_sfA                           |
| 28 | c__Epsilonproteobacteria, f__Campylobacteraceae, g__Campylobacter       |
| 29 | c__Erysipelotrichi, f__Erysipelotrichaceae, g__Allobaculum              |
| 30 | c__Erysipelotrichi, f__Erysipelotrichaceae, g__unclassified             |
| 31 | c__Gammaproteobacteria, f__Acidithiobacillaceae, g__Acidithiobacillus   |
| 32 | c__Gammaproteobacteria, f__Alteromonadaceae, g__Cellvibrio              |
| 33 | c__Gammaproteobacteria, f__Colwelliaceae, g__Colwellia                  |
| 34 | c__Gammaproteobacteria, f__Ectothiorhodospiraceae, g__unclassified      |
| 35 | c__Gammaproteobacteria, f__Enterobacteriaceae, g__Averyella             |
| 36 | c__Gammaproteobacteria, f__Enterobacteriaceae, g__Baumannia             |
| 37 | c__Gammaproteobacteria, f__Enterobacteriaceae, g__Dickeya               |
| 38 | c__Gammaproteobacteria, f__Enterobacteriaceae, g__Leclercia             |
| 39 | c__Gammaproteobacteria, f__Enterobacteriaceae, g__Pantoea               |
| 40 | c__Gammaproteobacteria, f__Enterobacteriaceae, g__Raoultella            |
| 41 | c__Gammaproteobacteria, f__Enterobacteriaceae, g__Salmonella            |
| 42 | c__Gammaproteobacteria, f__Enterobacteriaceae, g__Trabulsiella          |
| 43 | c__Gammaproteobacteria, f__Halomonadaceae, g__Chromohalobacter          |
| 44 | c__Gammaproteobacteria, f__Halomonadaceae, g__Cobetia                   |
| 45 | c__Gammaproteobacteria, f__Idiomarinaceae, g__unclassified              |
| 46 | c__Gammaproteobacteria, f__J115, g__unclassified                        |
| 47 | c__Gammaproteobacteria, f__Moraxellaceae, g__Moraxella                  |
| 48 | c__Gammaproteobacteria, f__Oceanospirillaceae, g__unclassified          |
| 49 | c__Gammaproteobacteria, f__Pasteurellaceae, g__Actinobacillus           |
| 50 | c__Gammaproteobacteria, f__Pasteurellaceae, g__Aggregatibacter          |
| 51 | c__Gammaproteobacteria, f__Pasteurellaceae, g__Haemophilus              |
| 52 | c__Gammaproteobacteria, f__Pasteurellaceae, g__unclassified             |
| 53 | c__Gammaproteobacteria, f__Piscirickettsiaceae, g__Thiomicrospira       |
| 54 | c__Gammaproteobacteria, f__SUP05, g__unclassified                       |
| 55 | c__Gammaproteobacteria, f__Thiotrichaceae, g__Leucothrix                |
| 56 | c__Gammaproteobacteria, f__unclassified_g_sfA                           |
| 57 | c__Gammaproteobacteria, f__Xanthomonadaceae, g__Stenotrophomonas        |
| 58 | c__Gammaproteobacteria, f__Xanthomonadaceae, g__unclassified            |
| 59 | c__Gammaproteobacteria, f__Xanthomonadaceae, g__Xanthomonas             |
| 60 | c__Oscillatoriothycideae, f__Phormidiaceae, g__Phormidium               |
| 61 | c__Planctomycea, f__Planctomycetaceae, g__unclassified                  |
| 62 | c__Synechococcophycideae, f__Synechococcaceae, g__Prochlorococcus       |
| 63 | c__TM7-3, f__unclassified_g_sfA                                         |

**Figure S3:** Genus and immunologic parameter identities for genera bearing one or more correlation with unadjusted  $P < 0.005$ , from analyses including all HIV-infected subjects studied. As was done in Figure 3A, Spearman correlation coefficients for taxa with representative species belonging to the same genus and displaying similar MFI trends were averaged, while the median  $P$  value of the same Spearman correlations was used to define genera with unadjusted  $P < 0.005$  (boxed intersections).

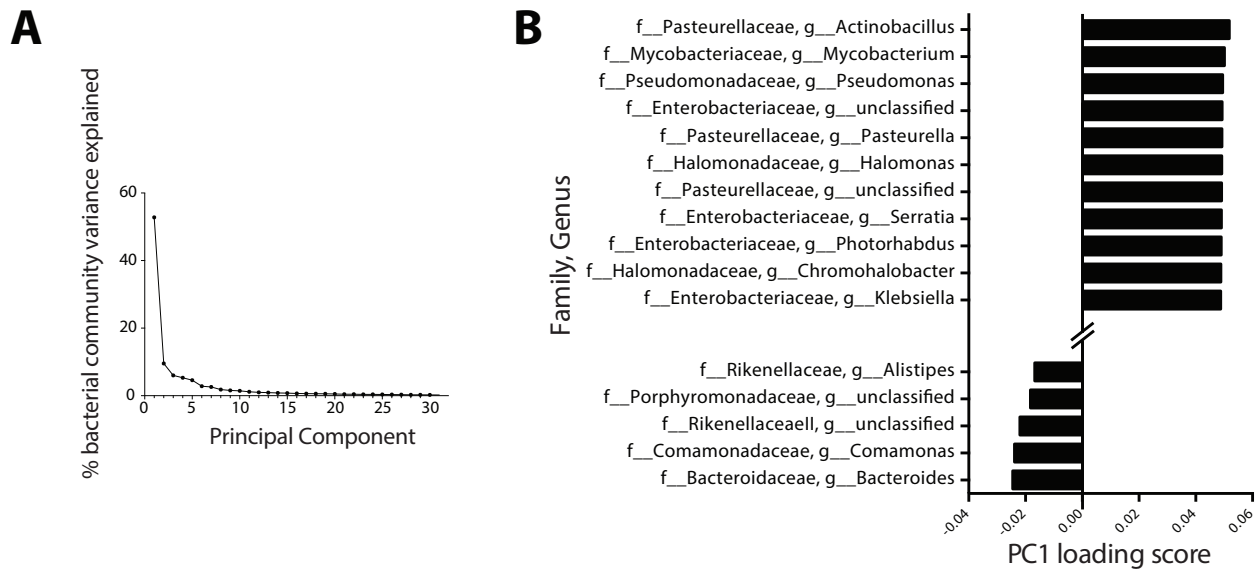

**Figure S4:** Principal component analysis characteristics. **(A)** Proportions of covariance in DMC taxon abundance data explained by first thirty principal components. A principal component analysis was performed as detailed in Methods, the first thirty of which represented 99.45% of DMC community covariance, while the first five principal components together represented 78.23% of covariance. **(B)** Loading scores for Principal Component 1 (PC1). Values of factor loading scores were ranked and maxima for the top genera loading most heavily toward the positive and negative extremes of PC1 are displayed.

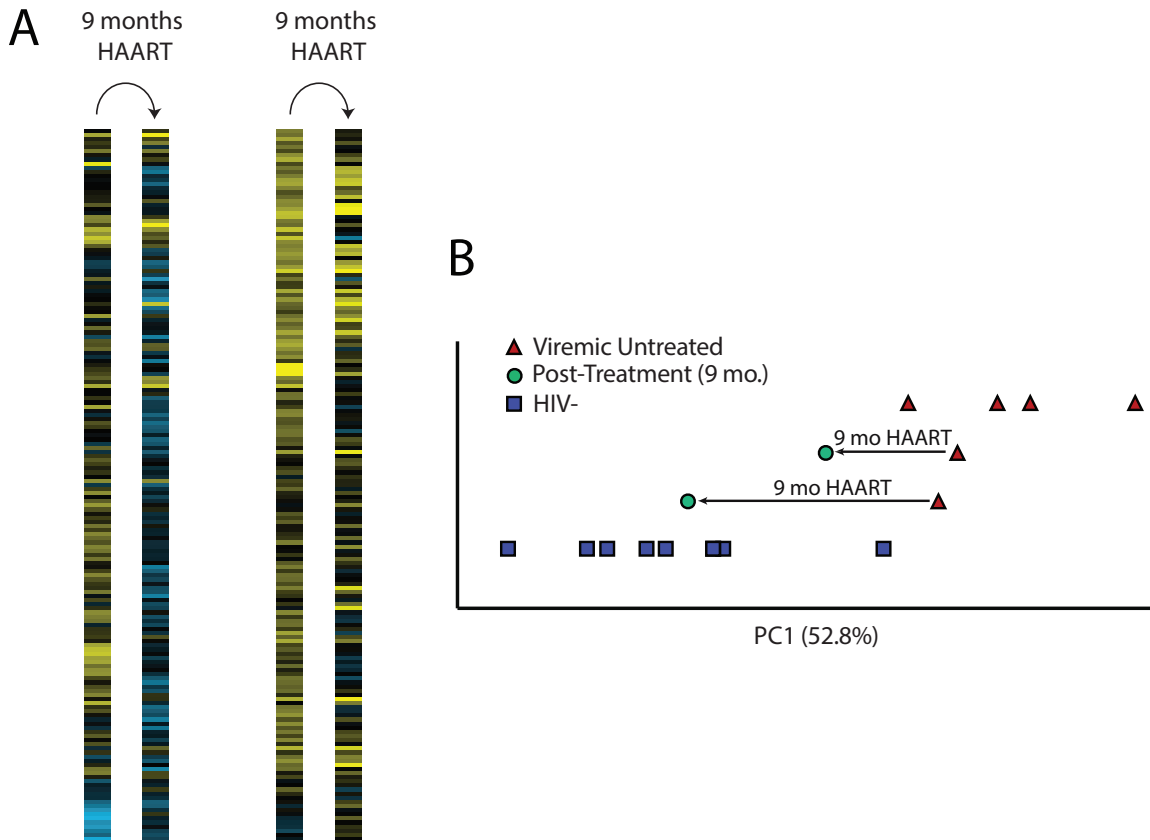

**Figure S5:** Highly active antiretroviral therapy causes a shift in DMC composition toward the healthy, uninfected state in two subjects. **(A)** Two viremic, untreated (VU) subjects returned for follow-up after 9 months of successful HAART (as determined by sustained undetectable plasma viral load). The abundance of genera within the DMC diminished significantly in both subjects upon treatment, as determined by a two-tailed, paired T-test ( $***P < 5 \times 10^{-10}$ ). **(B)** PC1 values are shown for VU (top row), HIV-uninfected (bottom row), and two subjects who were sampled when viremic and untreated and then again after nine months of HAART (middle two rows).

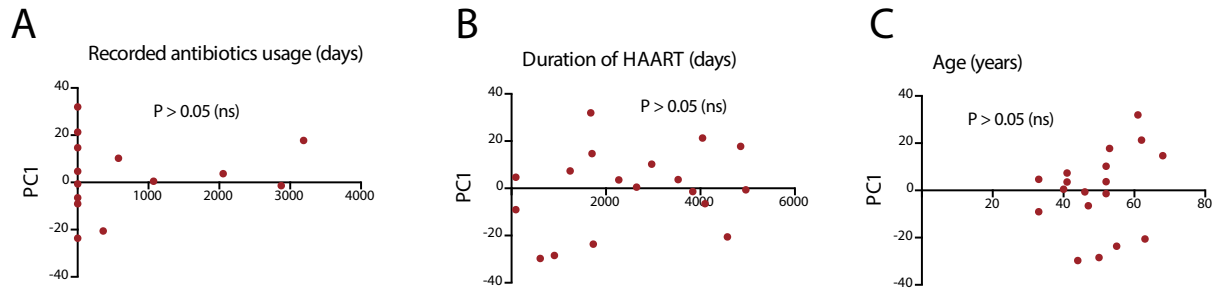

**Figure S6:** Comparison of adjustment variables (antibiotics usage, days on HAART, age) to PC1. The Spearman correlation method was used to test trends between antibiotics usage history (data available for 13 out of 18 subjects;  $P = 0.38$ ), days on HAART (data available for all subjects;  $P = 0.47$ ), and age (data available for all subjects;  $P = 0.21$ ).

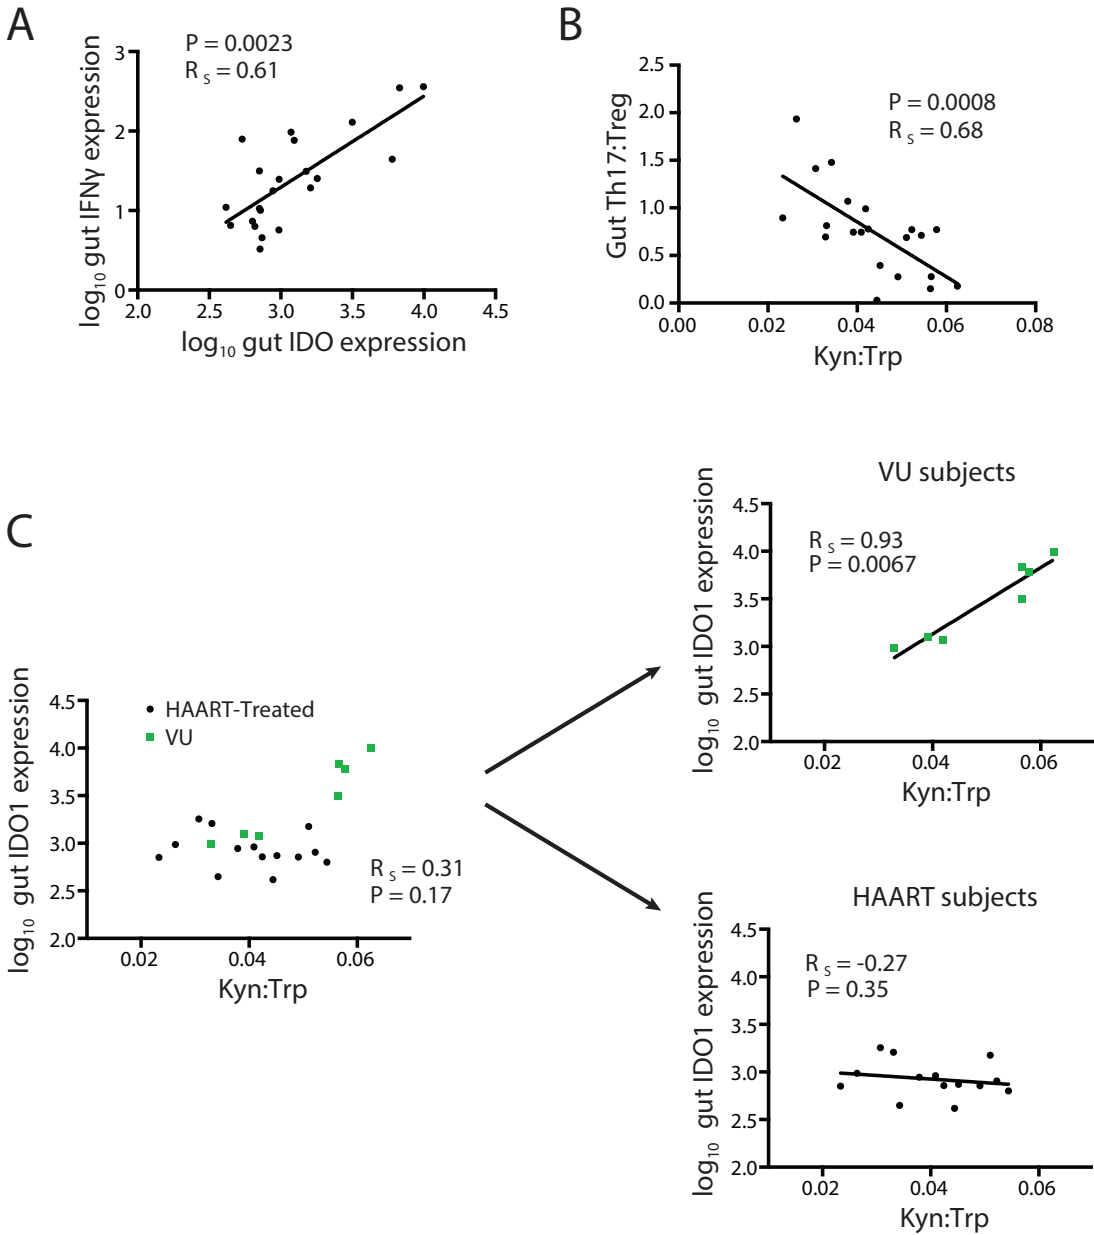

**Figure S7:** Relationships between IDO1 expression, IDO1 activity, T cell differentiation, and type II interferon. **(A)** Interferon  $\gamma$  expression and IDO1 expression was measured in all HIV-infected subjects studied by quantitative polymerase chain reaction from RNA extracted from whole rectosigmoid biopsy specimens, normalized to the housekeeping gene, HPRT, and compared using a Spearman correlation test. **(B)** Th17 and  $T_{reg}$  cells in the gut mucosa of all HIV-infected subjects were quantified using flow cytometry as described in Materials & Methods and compared. **(C)** Gut IDO1 expression

was compared to Kyn:Trp in all HIV-infected subjects, in VU subjects alone, and in HAART subjects alone.

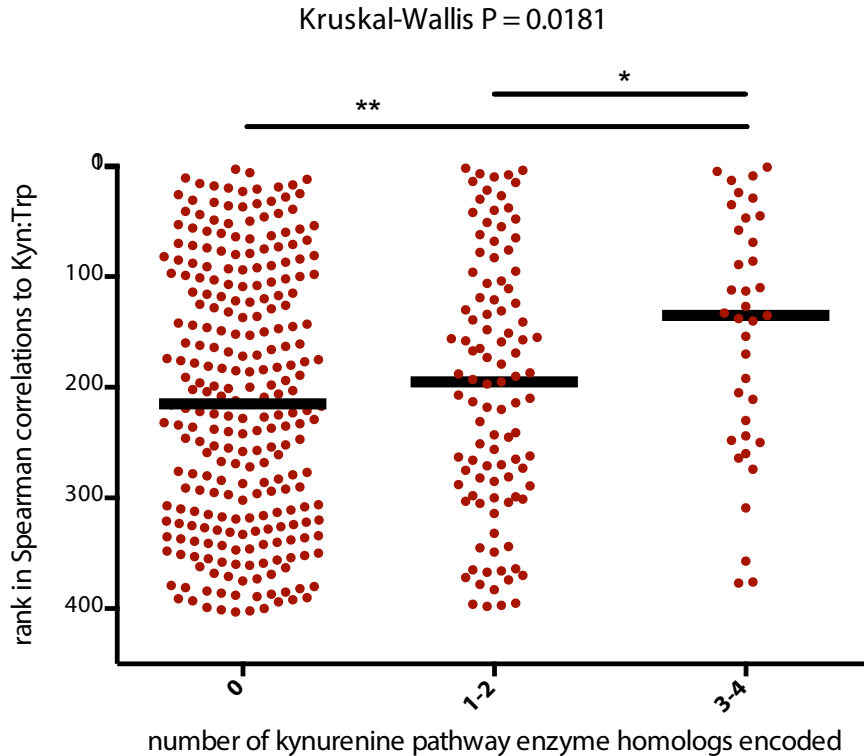

**Figure S8:** Bacterial taxa that predict plasma Kyn:Trp ratios in a multivariate machine learning analysis preferentially encode genetic homologs of tryptophan catabolism enzymes involved in the kynurenine pathway. The R package ‘randomForest’ was used to incorporate analysis of the effects of complex dependencies in microbial abundance data, and allowing for high-resolution multivariate assessment of the predictive capacity of microbial abundances toward plasma Kyn:Trp ratios. Results were similar to those using the univariate Spearman correlation method, in that genera that genetically encoded greater numbers of tryptophan-catabolizing enzymes better predicted Kyn:Trp ratios in plasma of HIV-infected subjects than did those with fewer or no genetic homologs to tryptophan-catabolizing enzymes.



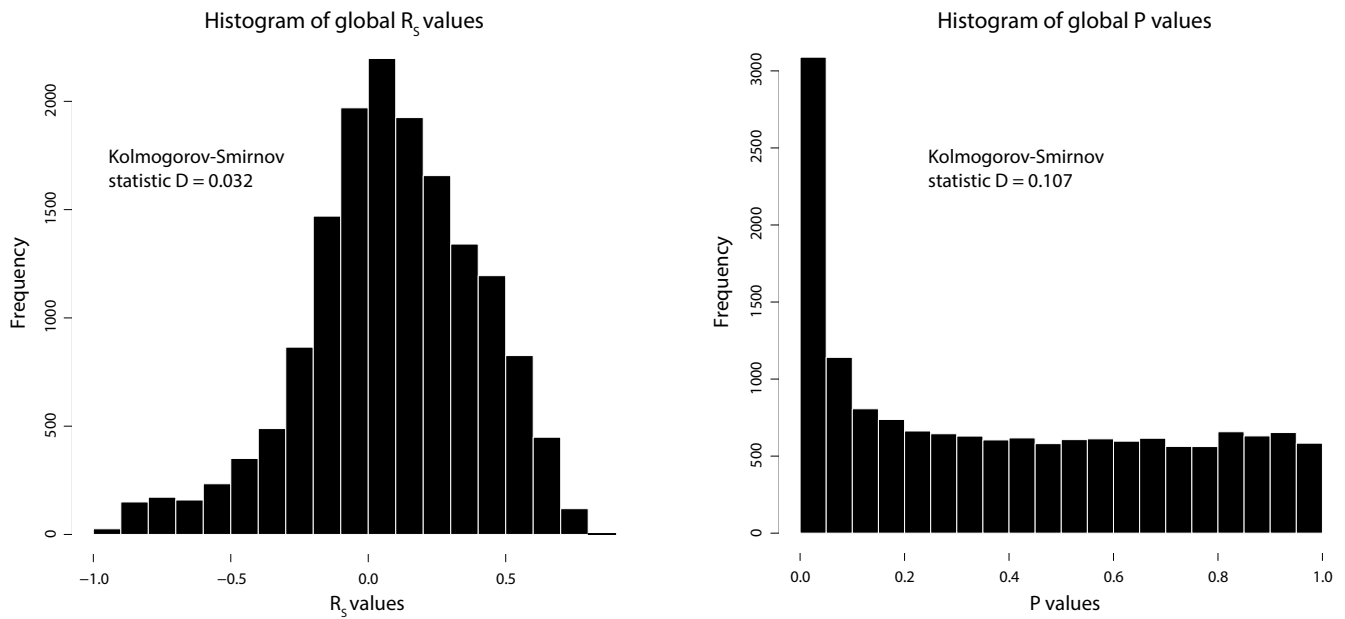

**Figure S9:** Data distribution of  $R_s$  and P values for all taxa as compared to all immunologic variables in Spearman correlation tests. Histograms depict frequency (y-axis) of each value for  $R_s$  and P values (x-axes), and show a normal distribution for  $R_s$  values and a non-normal distribution for P values.

**Table S1:** Patient cohort data. Paired blood and rectosigmoid biopsy specimens were collected from a cohort of male HIV-infected and uninfected subjects receiving care at San Francisco General Hospital with characteristics described below:

| Median (Range)                        | Age        | Viral Load                   | Duration of HAART | CD4 counts, cells/ul blood | Years since first seropositive test |
|---------------------------------------|------------|------------------------------|-------------------|----------------------------|-------------------------------------|
| <i>Viremic Untreated (n=6)</i>        | 33 (28-55) | 11716 copies/ml (1077-83800) | 0 years           | 356.3 (313-819)            | 2.20 (0.37-5.81)                    |
| <i>HAART-Treated (n=16)*</i>          | 52 (40-68) | <40 copies/ml                | > 2 years         | 374.5 (251-1110)           | 21.22 (7.81-32.17)                  |
| <i>Uninfected (n=9)</i>               | 46 (36-59) | <40 copies/ml                | 0 years           | 803 (460-1487)             | 0                                   |
| <i>Long Term Non-Progressor (n=1)</i> | 34         | 820 copies/ml                | 0 years           | 505                        | 21.12                               |

| Ethnicity (n)                         | African American | Asian | Caucasian | Hispanic/Latino | Multiracial | Native American | Pacific Islander |
|---------------------------------------|------------------|-------|-----------|-----------------|-------------|-----------------|------------------|
| <i>Viremic Untreated (n=6)</i>        | 1                | 1     | 3         | 0               | 1           | 0               | 0                |
| <i>HAART-Treated (n=16)*</i>          | 3                | 0     | 10        | 2               | 0           | 0               | 1                |
| <i>Uninfected (n=9)</i>               | 4                | 1     | 3         | 1               | 0           | 0               | 0                |
| <i>Long Term Non-Progressor (n=1)</i> | 0                | 0     | 1         | 0               | 0           | 0               | 0                |

**\*Note:** Two viremic untreated subjects returned after nine months of effective HAART (as determined by lack of detectable plasma viremia), at which point blood and rectosigmoid biopsy samples were obtained (thus totaling 18 HAART samples for analysis).

**Table S2:** DMC taxon phylogenetic classifications and statistical analyses. (Separately uploaded)

**Table S3:** Spearman correlations between individual taxa of the DMC and markers of disease progression, as calculated among all HIV-infected subjects. (Separately uploaded)

**Table S4:** Spearman correlations between PC1 and immunologic variables among all HIV-infected subjects.

| <b>Immune Variable</b>                                                                 | <b>Spearman<br/>R<sub>s</sub> value</b> | <b>Unadjusted<br/>P value</b> | <b>Benjamini-<br/>Hochberg<br/>adjusted P<br/>value</b> |
|----------------------------------------------------------------------------------------|-----------------------------------------|-------------------------------|---------------------------------------------------------|
| %CD38+DR+ amongst gut CD4+ T cells                                                     | 0.738                                   | 0.00047                       | 0.00746                                                 |
| Kyn:Trp ratio                                                                          | 0.684                                   | 0.00062                       | 0.00746                                                 |
| %CD38+DR+ amongst blood memory CD8+ T cells (all CD8+ after exclusion of CD27+CD45RO-) | 0.7                                     | 0.00121                       | 0.00966                                                 |
| %CD38+DR+ amongst gut CD8+ T cells                                                     | 0.649                                   | 0.00354                       | 0.02121                                                 |
| IP-10 pg/ml                                                                            | 0.543                                   | 0.00907                       | 0.04355                                                 |
| Soluble TNF-Receptor II pg/ml plasma                                                   | 0.493                                   | 0.01975                       | 0.07902                                                 |
| %IL-17+ in gut CD8+ T cells                                                            | -0.423                                  | 0.06344                       | 0.21691                                                 |
| Self-reported CD4+ T cell nadir                                                        | 0.366                                   | 0.0723                        | 0.21691                                                 |
| IL-6 pg/ml plasma                                                                      | 0.379                                   | 0.08205                       | 0.21881                                                 |
| %CD38+DR+ in blood memory CD4+ T cells (all CD4+ after exclusion of CD27+CD45RO-)      | 0.389                                   | 0.11054                       | 0.2653                                                  |
| D-Dimer ng/ml plasma                                                                   | 0.223                                   | 0.31842                       | 0.63683                                                 |
| Zonulin ng/ml plasma                                                                   | 0.223                                   | 0.31842                       | 0.63683                                                 |
| CD4+ T cell density in gut                                                             | 0.222                                   | 0.37623                       | 0.65517                                                 |
| %IL-22+ amongst gut CD8+ T cells                                                       | -0.196                                  | 0.38218                       | 0.65517                                                 |
| %IL-17+ amongst gut CD4+ T cells                                                       | -0.162                                  | 0.45994                       | 0.69009                                                 |
| HIV RNA copies/1e6 cells                                                               | 0.162                                   | 0.46006                       | 0.69009                                                 |
| IFAB pg/ml plasma                                                                      | -0.15                                   | 0.50629                       | 0.69746                                                 |
| %IL-22+ amongst gut CD4+ T cells                                                       | -0.14                                   | 0.5231                        | 0.69746                                                 |
| Cumulative measure of interferon-stimulated gene (ISG) expression*                     | 0.104                                   | 0.65403                       | 0.80936                                                 |
| sCD14 ng/ml plasma                                                                     | -0.097                                  | 0.67447                       | 0.80936                                                 |
| %Treg in gut (CD25+FoxP3+) of total CD4+ T cells                                       | 0.078                                   | 0.71192                       | 0.81363                                                 |
| Gut IDO1 relative mRNA                                                                 | 0.069                                   | 0.74976                       | 0.81792                                                 |
| HIV DNA copies/1e6 cells                                                               | 0.057                                   | 0.80098                       | 0.8358                                                  |
| CD4+ T cell count                                                                      | 0.031                                   | 0.88452                       | 0.88452                                                 |

\*A cumulative measure of ISG expression was obtained by quantitative PCR of four selected ISGs (GBP1, IFI27, MX1, and OAS1). Cts were subtracted from the housekeeping gene HPRT, and a geometric mean was calculated for all four genes on a per subject basis, yielding the final measure used for comparison to PC1.

**Table S5:** Spearman correlations between PC1 and immunologic variables among HIV+ subjects on HAART.

| <b>Immune Variable</b>                                                                 | <b>Spearman<br/>R<sub>s</sub> value</b> | <b>Unadjusted<br/>P value</b> | <b>Benjamini-<br/>Hochberg<br/>adjusted P<br/>value</b> |
|----------------------------------------------------------------------------------------|-----------------------------------------|-------------------------------|---------------------------------------------------------|
| IL-6 pg/ml plasma                                                                      | 0.743                                   | 0.0015                        | 0.036                                                   |
| Kyn:Trp ratio                                                                          | 0.727                                   | 0.0032                        | 0.038                                                   |
| Soluble TNF-Receptor II pg/ml plasma                                                   | 0.654                                   | 0.0082                        | 0.066                                                   |
| D-Dimer ng/ml plasma                                                                   | 0.607                                   | 0.0164                        | 0.095                                                   |
| Gut IDO1 relative mRNA                                                                 | -0.559                                  | 0.0197                        | 0.095                                                   |
| IP-10 pg/ml                                                                            | 0.561                                   | 0.0297                        | 0.119                                                   |
| %CD38+DR+ amongst gut CD4+ T cells                                                     | 0.556                                   | 0.0389                        | 0.134                                                   |
| HIV RNA copies/1e6 cells                                                               | -0.491                                  | 0.0534                        | 0.16                                                    |
| Zonulin ng/ml plasma                                                                   | 0.486                                   | 0.0664                        | 0.177                                                   |
| %CD38+DR+ in blood memory CD8+ T cells (all CD8+ after exclusion of CD27+CD45RO-)      | 0.489                                   | 0.076                         | 0.182                                                   |
| %IL-17+ amongst gut CD8+ T cells                                                       | -0.382                                  | 0.1598                        | 0.349                                                   |
| %CD38+DR+ amongst gut CD8+ T cells                                                     | 0.337                                   | 0.2392                        | 0.478                                                   |
| sCD14 ng/ml plasma                                                                     | 0.213                                   | 0.4643                        | 0.812                                                   |
| %CD38+DR+ amongst blood memory CD4+ T cells (all CD4+ after exclusion of CD27+CD45RO-) | 0.209                                   | 0.4738                        | 0.812                                                   |
| HIV DNA copies/1e6 cells                                                               | -0.186                                  | 0.5075                        | 0.812                                                   |
| %Treg in gut (CD25+FoxP3+) of total CD4+ T cells                                       | 0.123                                   | 0.6273                        | 0.889                                                   |
| IFAB pg/ml plasma                                                                      | -0.136                                  | 0.6296                        | 0.889                                                   |
| Self-reported CD4+ T cell nadir                                                        | 0.088                                   | 0.7293                        | 0.966                                                   |
| CD4 T+ cell density in gut                                                             | 0.077                                   | 0.8122                        | 0.966                                                   |
| Cumulative measure of interferon-stimulated gene (ISG) expression*                     | -0.053                                  | 0.8456                        | 0.966                                                   |
| %IL-17+ amongst gut CD4+ T cells                                                       | 0.041                                   | 0.8797                        | 0.966                                                   |
| %IL-22+ amongst gut CD8+ T cells                                                       | -0.039                                  | 0.8894                        | 0.966                                                   |
| %IL-22+ amongst gut CD4+ T cells                                                       | -0.021                                  | 0.9397                        | 0.966                                                   |
| CD4+ T cell count                                                                      | 0.011                                   | 0.9665                        | 0.966                                                   |

\*A cumulative measure of ISG expression was obtained by quantitative PCR of four selected ISGs (GBP1, IFI27, MX1, and OAS1). Cts were subtracted from the housekeeping gene HPRT, and a geometric mean was calculated for all four genes on a per subject basis, yielding the final measure used for comparison to PC1.

**Table S6:** Comparisons of PC1 marker of dysbiosis to gut inflammatory gene expression in whole rectosigmoid biopsy specimens.

| <b>Variable</b> | <b>Spearman<br/>R<sub>s</sub> value</b> | <b>Unadjusted<br/>P value</b> |
|-----------------|-----------------------------------------|-------------------------------|
| TNFa            | 0.35                                    | 0.27                          |
| CYBB            | -0.28                                   | 0.29                          |
| IFNa2           | -0.2                                    | 0.45                          |
| IFNb            | 0.15                                    | 0.57                          |
| IFNg            | -0.15                                   | 0.59                          |
| Arginase 1      | -0.14                                   | 0.62                          |
| NOS2            | 0.08                                    | 0.76                          |

**Table S7:** Spearman correlation to Kyn:Trp genus ranks, and analysis of kynurenine pathway metabolic enzymes (those involved in metabolism of tryptophan to 3-hydroxyanthranilic acid) in bacteria. Spearman correlation tests were performed on all detected taxa as compared to Kyn:Trp ratios in plasma of HIV-infected subjects. P values were adjusted for multiple comparisons using the Benjamini-Hochberg technique (80). The UniProt Consortium database (52) ([www.uniprot.org](http://www.uniprot.org)) was queried for all annotated bacterial enzymes within the pathway to catabolize tryptophan to 3-hydroxyanthranilic acid as described in Methods. (Separately uploaded)
